# Supplementary material for: Oral anticoagulation therapy initiation in patients with atrial fibrillation in relation to world region of origin: a register-based nationwide study
Source: PubMed Central journal article supplement — Open Heart. 2024 Mar 29;11(1):e002544. doi: 10.1136/openhrt-2023-002544 (PMC10982797; doi:10.1136/openhrt-2023-002544), 2024-03-29
Supplement: openhrt-2023-002544supp001.pdf [file openhrt-2023-002544supp001.pdf]

## Supplementary Tables

### Absolute numbers

Supplementary Table 1: Number of incident AF-patients with a high risk of stroke

|                    | No OAC initiation according to guidelines | OAC initiation according to guidelines | Total   |
|--------------------|-------------------------------------------|----------------------------------------|---------|
| Danish origin      | 126,603                                   | 127,983                                | 254,586 |
| Western origin     | 3,364                                     | 3,309                                  | 6,673   |
| Non-Western origin | 2,085                                     | 1,672                                  | 3,757   |
| <b>Total</b>       | 132,052                                   | 132,964                                | 265,016 |

Supplementary Table 2: Number of incident AF-patients with a high risk of stroke divided according to guidelines

|                                                       | Number of incident AF-patients with no OAC initiation according to guidelines | Number of incident AF-patients with OAC initiation according to guidelines |
|-------------------------------------------------------|-------------------------------------------------------------------------------|----------------------------------------------------------------------------|
| <i>Guideline valid from 1998-2001</i>                 |                                                                               |                                                                            |
| Danish origin                                         | 22,500                                                                        | 12,216                                                                     |
| Western origin                                        | 585                                                                           | 271                                                                        |
| Non-Western origin                                    | 241                                                                           | 103                                                                        |
| <i>Guideline valid from 2001-2006</i>                 |                                                                               |                                                                            |
| Danish origin                                         | 40,248                                                                        | 29,583                                                                     |
| Western origin                                        | 1,011                                                                         | 733                                                                        |
| Non-Western origin                                    | 553                                                                           | 279                                                                        |
| <i>Guideline valid from 2006-2011</i>                 |                                                                               |                                                                            |
| Danish origin                                         | 25,353                                                                        | 18,377                                                                     |
| Western origin                                        | 646                                                                           | 490                                                                        |
| Non-Western origin                                    | 426                                                                           | 265                                                                        |
| <i>Guideline valid from 2011-2013</i>                 |                                                                               |                                                                            |
| Danish origin                                         | 15,826                                                                        | 17,966                                                                     |
| Western origin                                        | 473                                                                           | 485                                                                        |
| Non-Western origin                                    | 314                                                                           | 281                                                                        |
| <i>Guideline valid from 2013-2017</i>                 |                                                                               |                                                                            |
| Danish origin                                         | 22,676                                                                        | 49,841                                                                     |
| Western origin                                        | 649                                                                           | 1,330                                                                      |
| Non-Western origin                                    | 551                                                                           | 744                                                                        |
| <i>Guideline valid from 2013-2017, NOAC treatment</i> |                                                                               |                                                                            |
| Danish origin                                         | 38,849                                                                        | 33,668                                                                     |
| Western origin                                        | 1,007                                                                         | 972                                                                        |
| Non-Western origin                                    | 770                                                                           | 525                                                                        |
| <i>Guideline valid from 2013-2017, VKA treatment</i>  |                                                                               |                                                                            |
| Danish origin                                         | 54,214                                                                        | 18,303                                                                     |
| Western origin                                        | 1,559                                                                         | 420                                                                        |
| Non-Western origin                                    | 1,047                                                                         | 248                                                                        |

### IRR results in tables

Supplementary Table 3: Unadjusted and adjusted IRR of OAC initiation according to origin for the guideline from 1998

|                      | Unadjusted IRR [95% CI] | Adjusted* IRR [95% CI] |
|----------------------|-------------------------|------------------------|
| Danish origin (ref.) | 1                       | 1                      |
| Western origin       | 0.90 [0.81;0.99]        | 0.94 [0.85;1.03]       |

|                           |                  |                  |
|---------------------------|------------------|------------------|
| <b>Non-Western origin</b> | 0.85 [0.72;1.00] | 0.75 [0.63;0.88] |
|---------------------------|------------------|------------------|

Adjusted for: sex, age, income, work adherence, educational level, heart failure, hypertension, diabetes, prior stroke/TIA/thromboembolism, myocardial infarction, and antiplatelet drugs

Supplementary Table 4: Unadjusted and adjusted IRR of OAC initiation according to origin for the guideline from **2001**

|                             | <b>Unadjusted IRR [95% CI]</b> | <b>Adjusted* IRR [95% CI]</b> |
|-----------------------------|--------------------------------|-------------------------------|
| <b>Danish origin (ref.)</b> | 1                              | 1                             |
| <b>Western origin</b>       | 0.99 [0.94;1.05]               | 0.99 [0.93;1.05]              |
| <b>Non-Western origin</b>   | 0.79 [0.72;0.87]               | 0.73 [0.66;0.80]              |

Adjusted for: sex, age, income, work adherence, educational level, heart failure, hypertension, diabetes, prior stroke/TIA/thromboembolism, myocardial infarction, antiplatelet drugs, and thyrotoxicosis

Supplementary Table 5: Unadjusted and adjusted IRR of OAC initiation according to origin for the guideline from **2006**

|                             | <b>Unadjusted IRR [95% CI]</b> | <b>Adjusted* IRR [95% CI]</b> |
|-----------------------------|--------------------------------|-------------------------------|
| <b>Danish origin (ref.)</b> | 1                              | 1                             |
| <b>Western origin</b>       | 1.03 [0.96;1.10]               | 0.99 [0.91;1.07]              |
| <b>Non-Western origin</b>   | 0.91 [0.83;1.00]               | 0.80 [0.72;0.90]              |

Adjusted for: sex, age, income, work adherence, educational level, heart failure, hypertension, diabetes, prior stroke/TIA/thromboembolism, myocardial infarction, antiplatelet drugs, thyrotoxicosis, and coronary artery disease

Supplementary Table 6: Unadjusted and adjusted IRR of OAC initiation according to origin for the guideline from **2010**

|                             | <b>Unadjusted IRR [95% CI]</b> | <b>Adjusted* IRR [95% CI]</b> |
|-----------------------------|--------------------------------|-------------------------------|
| <b>Danish origin (ref.)</b> | 1                              | 1                             |
| <b>Western origin</b>       | 0.95 [0.89;1.01]               | 0.96 [0.90;1.02]              |
| <b>Non-Western origin</b>   | 0.89 [0.81;0.97]               | 0.89 [0.82;0.97]              |

Adjusted for: sex, age, income, work adherence, educational level, heart failure, hypertension, diabetes, prior stroke/TIA/thromboembolism, myocardial infarction, antiplatelet drugs, major bleeding, renal disease, liver disease, peripheral artery disease/aortic plaque, NSAID

Supplementary Table 7: Unadjusted and adjusted IRR of OAC initiation according to origin for the guideline from **2012**

|                             | <b>Unadjusted IRR [95% CI]</b> | <b>Adjusted* IRR [95% CI]</b> |
|-----------------------------|--------------------------------|-------------------------------|
| <b>Danish origin (ref.)</b> | 1                              | 1                             |
| <b>Western origin</b>       | 0.98 [0.95;1.00]               | 0.99 [0.96;1.0]               |
| <b>Non-Western origin</b>   | 0.84 [0.80;0.88]               | 0.88 [0.84;0.92]              |

Adjusted for: sex, age, income, work adherence, educational level, heart failure, hypertension, diabetes, prior stroke/TIA/thromboembolism, myocardial infarction, antiplatelet drugs, major bleeding, renal disease, liver disease, peripheral artery disease/aortic plaque, NSAID

Supplementary Table 8: Unadjusted and adjusted IRR of OAC initiation according to origin for the guideline from **2012** with NOAC as treatment

|                             | <b>Unadjusted IRR [95% CI]</b> | <b>Adjusted* IRR [95% CI]</b> |
|-----------------------------|--------------------------------|-------------------------------|
| <b>Danish origin (ref.)</b> | 1                              | 1                             |
| <b>Western origin</b>       | 1.06 [1.01;1.11]               | 1.06 [1.01;1.11]              |
| <b>Non-Western origin</b>   | 0.87 [0.82;0.93]               | 0.95 [0.89;1.01]              |

Adjusted for: sex, age, income, work adherence, educational level, heart failure, hypertension, diabetes, prior stroke/TIA/thromboembolism, myocardial infarction, antiplatelet drugs, major bleeding, renal disease, liver disease, peripheral artery disease/aortic plaque, NSAID

Supplementary Table 9: Unadjusted and adjusted IRR of OAC initiation according to origin for the guideline from 2012 with VKA as treatment

|                             | Unadjusted IRR [95% CI] | Adjusted* IRR [95% CI] |
|-----------------------------|-------------------------|------------------------|
| <b>Danish origin (ref.)</b> | 1                       | 1                      |
| <b>Western origin</b>       | 0.84 [0.77;0.92]        | 0.87 [0.80;0.95]       |
| <b>Non-Western origin</b>   | 0.88 [0.68;0.85]        | 0.75 [0.67;0.84]       |

Adjusted for: sex, age, income, work adherence, educational level, heart failure, hypertension, diabetes, prior stroke/TIA/thromboembolism, myocardial infarction, antiplatelet drugs, major bleeding, renal disease, liver disease, peripheral artery disease/aortic plaque, NSAID

**Results stratified by sex**

Supplementary Table 10: Unadjusted and adjusted IRR of OAC initiation according to origin stratified by sex for the guideline published in **1998**

|                             | Unadjusted IRR [95% CI] |                  | Adjusted* IRR [95% CI] |                  |
|-----------------------------|-------------------------|------------------|------------------------|------------------|
|                             | Male                    | Female           | Male                   | Female           |
| <b>Danish origin (ref.)</b> | 1                       | 1                | 1                      | 1                |
| <b>Western origin</b>       | 0.94 [0.82;1.07]        | 0.92 [0.80;1.06] | 0.95 [0.84;1.08]       | 0.92 [0.80;1.06] |
| <b>Non-Western origin</b>   | 0.80 [0.65;0.99]        | 0.92 [0.72;1.18] | 0.74 [0.60;2.40]       | 0.76 [0.59;0.98] |

Adjusted for: age, income, work adherence, educational level, heart failure, hypertension, diabetes, prior stroke/TIA/thromboembolism, myocardial infarction, and antiplatelet drugs

Supplementary Table 11: Unadjusted and adjusted IRR of OAC initiation according to origin stratified by sex for the guideline published in **2001**

|                             | Unadjusted IRR [95% CI] |                  | Adjusted* IRR [95% CI] |                  |
|-----------------------------|-------------------------|------------------|------------------------|------------------|
|                             | Male                    | Female           | Male                   | Female           |
| <b>Danish origin (ref.)</b> | 1                       | 1                | 1                      | 1                |
| <b>Western origin</b>       | 1.03 [0.96;1.11]        | 1.00 [0.92;1.09] | 1.00 [0.93;1.07]       | 1.00 [0.92;1.09] |
| <b>Non-Western origin</b>   | 0.76 [0.67;0.85]        | 0.84 [0.72;0.98] | 0.72 [0.63;0.82]       | 0.74 [0.63;0.87] |

Adjusted for: sex, age, income, work adherence, educational level, heart failure, hypertension, diabetes, prior stroke/TIA/thromboembolism, myocardial infarction, antiplatelet drugs, and thyrotoxicosis

Supplementary Table 12: Unadjusted and adjusted IRR of OAC initiation according to origin stratified by sex for the guideline published in **2006**

|                             | Unadjusted IRR [95% CI] |                  | Adjusted* IRR [95% CI] |                  |
|-----------------------------|-------------------------|------------------|------------------------|------------------|
|                             | Male                    | Female           | Male                   | Female           |
| <b>Danish origin (ref.)</b> | 1                       | 1                | 1                      | 1                |
| <b>Western origin</b>       | 1.07 [0.98;1.17]        | 1.03 [0.93;1.14] | 1.00 [0.90;1.11]       | 1.00 [0.88;1.12] |
| <b>Non-Western origin</b>   | 0.78 [0.68;0.89]        | 1.09 [0.96;1.24] | 0.74 [0.64;0.87]       | 0.87 [0.75;1.05] |

Adjusted for: sex, age, income, work adherence, educational level, heart failure, hypertension, diabetes, prior stroke/TIA/thromboembolism, myocardial infarction, antiplatelet drugs, thyrotoxicosis, and coronary artery disease

Supplementary Table 13: Unadjusted and adjusted IRR of OAC initiation according to origin stratified by sex for the guideline published in **2010**

|                             | Unadjusted IRR [95% CI] |                  | Adjusted* IRR [95% CI] |                  |
|-----------------------------|-------------------------|------------------|------------------------|------------------|
|                             | Male                    | Female           | Male                   | Female           |
| <b>Danish origin (ref.)</b> | 1                       | 1                | 1                      | 1                |
| <b>Western origin</b>       | 0.94 [0.87;1.03]        | 0.97 [0.89;1.07] | 0.94 [0.87;1.03]       | 0.97 [0.88;1.06] |
| <b>Non-Western origin</b>   | 0.87 [0.77;0.97]        | 0.91 [0.80;1.04] | 0.87 [0.79;0.99]       | 0.90 [0.79;1.03] |

Adjusted for: sex, age, income, work adherence, educational level, heart failure, hypertension, diabetes, prior stroke/TIA/thromboembolism, myocardial infarction, antiplatelet drugs, major bleeding, renal disease, liver disease, peripheral artery disease/aortic plaque, NSAID

Supplementary Table 14: Unadjusted and adjusted IRR of OAC initiation according to origin stratified by sex for the guideline published in **2012**

|  | Unadjusted IRR [95% CI] |        | Adjusted* IRR [95% CI] |        |
|--|-------------------------|--------|------------------------|--------|
|  | Male                    | Female | Male                   | Female |

|                             |                  |                  |                  |                  |
|-----------------------------|------------------|------------------|------------------|------------------|
| <b>Danish origin (ref.)</b> | 1                | 1                | 1                | 1                |
| <b>Western origin</b>       | 1.00 [0.96;1.04] | 0.96 [0.92;1.01] | 1.01 [0.97;1.05] | 0.97 [0.93;1.02] |
| <b>Non-Western origin</b>   | 0.82 [0.77;0.88] | 0.85 [0.80;0.91] | 0.87 [0.81;0.92] | 0.90 [0.84;0.96] |

Adjusted for: sex, age, income, work adherence, educational level, heart failure, hypertension, diabetes, prior stroke/TIA/thromboembolism, myocardial infarction, antiplatelet drugs, major bleeding, renal disease, liver disease, peripheral artery disease/aortic plaque, NSAID

**Results stratified by age groups**

Supplementary Table 15: Unadjusted and adjusted IRR of OAC initiation according to origin stratified by age groups for the guideline published in **1998**

|                             | Unadjusted IRR [95% CI] |                     |                     | Adjusted* IRR [95% CI] |                     |                     |
|-----------------------------|-------------------------|---------------------|---------------------|------------------------|---------------------|---------------------|
|                             | Age <65                 | Age >64 & <75       | Age >74             | Age <65                | Age >64 & <75       | Age >74             |
| <b>Danish origin (ref.)</b> | 1                       | 1                   | 1                   | 1                      | 1                   | 1                   |
| <b>Western origin</b>       | 0.93<br>[0.78;1.11]     | 0.96<br>[0.84;1.10] | 0.82<br>[0.68;1.00] | 0.98<br>[0.83;1.16]    | 0.98<br>[0.86;1.23] | 0.83<br>[0.68;1.01] |
| <b>Non-Western origin</b>   | 0.74<br>[0.59;0.92]     | 0.64<br>[0.49;0.84] | 0.95<br>[0.62;1.47] | 0.83<br>[0.66;1.04]    | 0.68<br>[0.52;0.89] | 0.98<br>[0.64;1.51] |

Adjusted for: sex, age, income, work adherence, educational level, heart failure, hypertension, diabetes, prior stroke/TIA/thromboembolism, myocardial infarction, and antiplatelet drugs

Supplementary Table 16: Unadjusted and adjusted IRR of OAC initiation according to origin stratified by age groups for the guideline published in **2001**

|                             | Unadjusted IRR [95% CI] |                     |                     | Adjusted* IRR [95% CI] |                     |                     |
|-----------------------------|-------------------------|---------------------|---------------------|------------------------|---------------------|---------------------|
|                             | Age <65                 | Age >64 & <75       | Age >74             | Age <65                | Age >64 & <75       | Age >74             |
| <b>Danish origin (ref.)</b> | 1                       | 1                   | 1                   | 1                      | 1                   | 1                   |
| <b>Western origin</b>       | 1.00<br>[0.92;1.07]     | 1.01<br>[0.92;1.10] | 0.90<br>[0.77;1.06] | 1.00<br>[0.93;1.07]    | 1.03<br>[0.93;1.13] | 0.89<br>[0.75;1.06] |
| <b>Non-Western origin</b>   | 0.72<br>[0.64;0.81]     | 0.68<br>[0.56;0.82] | 0.52<br>[0.30;0.88] | 0.77<br>[0.68;0.86]    | 0.76<br>[0.62;0.93] | 0.53<br>[0.31;0.90] |

Adjusted for: sex, age, income, work adherence, educational level, heart failure, hypertension, diabetes, prior stroke/TIA/thromboembolism, myocardial infarction, antiplatelet drugs, and thyrotoxicosis

Supplementary Table 17: Unadjusted and adjusted IRR of OAC initiation according to origin stratified by age groups for the guideline published in **2006**

|                             | Unadjusted IRR [95% CI] |                     |                     | Adjusted* IRR [95% CI] |                     |                     |
|-----------------------------|-------------------------|---------------------|---------------------|------------------------|---------------------|---------------------|
|                             | Age <65                 | Age >64 & <75       | Age >74             | Age <65                | Age >64 & <75       | Age >74             |
| <b>Danish origin (ref.)</b> | 1                       | 1                   | 1                   | 1                      | 1                   | 1                   |
| <b>Western origin</b>       | 0.98<br>[0.90;1.07]     | 1.00<br>[0.90;1.11] | 1.11<br>[0.85;1.44] | 1.00<br>[0.90;1.10]    | 0.97<br>[0.84;1.12] | 0.93<br>[0.63;1.35] |
| <b>Non-Western origin</b>   | 0.76<br>[0.68;0.85]     | 0.80<br>[0.66;0.97] | 1.19<br>[0.66;2.12] | 0.81<br>[0.72;0.92]    | 0.74<br>[0.56;0.17] | 1.25<br>[0.62;2.52] |

Adjusted for: sex, age, income, work adherence, educational level, heart failure, hypertension, diabetes, prior stroke/TIA/thromboembolism, myocardial infarction, antiplatelet drugs, thyrotoxicosis, and coronary artery disease

Supplementary Table 18: Unadjusted and adjusted IRR of OAC initiation according to origin stratified by age groups for the guideline published in **2010**

|  | Unadjusted IRR [95% CI] |               |         | Adjusted* IRR [95% CI] |               |         |
|--|-------------------------|---------------|---------|------------------------|---------------|---------|
|  | Age <65                 | Age >64 & <75 | Age >74 | Age <65                | Age >64 & <75 | Age >74 |

|                             |                     |                     |                     |                     |                     |                     |
|-----------------------------|---------------------|---------------------|---------------------|---------------------|---------------------|---------------------|
| <b>Danish origin (ref.)</b> | 1                   | 1                   | 1                   | 1                   | 1                   | 1                   |
| <b>Western origin</b>       | 0.97<br>[0.91;1.04] | 0.86<br>[0.74;1.00] | 0.70<br>[0.43;1.16] | 0.99<br>[0.92;1.05] | 0.88<br>[0.75;1.01] | 0.73<br>[0.43;1.22] |
| <b>Non-Western origin</b>   | 0.82<br>[0.75;0.90] | 0.94<br>[0.77;1.15] | 0.43<br>[0.07;2.76] | 0.88<br>[0.80;0.96] | 0.96<br>[0.77;1.18] | 0.39<br>[0.09;1.70] |

Adjusted for: sex, age, income, work adherence, educational level, heart failure, hypertension, diabetes, prior stroke/TIA/thromboembolism, myocardial infarction, antiplatelet drugs, major bleeding, renal disease, liver disease, peripheral artery disease/aortic plaque, NSAID

Supplementary Table 19: Unadjusted and adjusted IRR of OAC initiation according to origin stratified by age groups for the guideline published in 2012

|                             | Unadjusted IRR [95% CI] |                     |                     | Adjusted* IRR [95% CI] |                     |                     |
|-----------------------------|-------------------------|---------------------|---------------------|------------------------|---------------------|---------------------|
|                             | Age <65                 | Age >64 & <75       | Age >74             | Age <65                | Age >64 & <75       | Age >74             |
| <b>Danish origin (ref.)</b> | 1                       | 1                   | 1                   | 1                      | 1                   | 1                   |
| <b>Western origin</b>       | 0.98<br>[0.92;1.01]     | 0.95<br>[0.88;1.02] | 1.07<br>[0.86;1.32] | 0.99<br>[0.96;1.02]    | 0.95<br>[0.89;1.03] | 1.11<br>[0.90;1.37] |
| <b>Non-Western origin</b>   | 0.81<br>[0.77;0.85]     | 0.88<br>[0.77;1.00] | 1.19<br>[0.77;1.83] | 0.86<br>[0.82;0.91]    | 0.89<br>[0.78;1.03] | 1.32<br>[0.87;1.99] |

Adjusted for: sex, age, income, work adherence, educational level, heart failure, hypertension, diabetes, prior stroke/TIA/thromboembolism, myocardial infarction, antiplatelet drugs, major bleeding, renal disease, liver disease, peripheral artery disease/aortic plaque, NSAID

## Codes

Supplementary Table 20: ICD-10 codes, ATC codes, and NCSP codes for included diseases, medications, and procedures

| Disease, medication, or procedure | ICD-10                | ATC                                                            | NCSP                                               |
|-----------------------------------|-----------------------|----------------------------------------------------------------|----------------------------------------------------|
| AF                                | DI48                  | A10                                                            |                                                    |
| Vitamin K antagonists (VKA)       |                       | B01AA03, B01AA04                                               |                                                    |
| Oral Anticoagulants (OAC)         |                       | B01AA03<br>B01AA04<br>B01AF01<br>B01AF02<br>B01AF03<br>B01AX06 |                                                    |
| Dabigatran                        |                       | B01AE07                                                        |                                                    |
| Diabetes                          | DE10-14; DE249; DE250 |                                                                |                                                    |
| Hypertension                      | DI10-15               | C02; C03; C07; C08; C09                                        |                                                    |
| Heart failure                     | DI50                  |                                                                |                                                    |
| Prosthetic heart valve            | DZ952; DI05, DI342    |                                                                | KFCA60; KFGE00;<br>KFJF00; KFKD00;<br>KFMD00; KFKA |
| Prior stroke                      | DG458, DG459          |                                                                |                                                    |
| Transient Ischemic Attack (TIA)   | DG45                  |                                                                |                                                    |

|                                                 |                                                                                                                                                                                                                                       |      |                                                                    |
|-------------------------------------------------|---------------------------------------------------------------------------------------------------------------------------------------------------------------------------------------------------------------------------------------|------|--------------------------------------------------------------------|
| Systemic embolus                                | DI74                                                                                                                                                                                                                                  |      |                                                                    |
| Myocardial infarction                           | I21, I22, I23                                                                                                                                                                                                                         |      |                                                                    |
| Antiplatelet drugs                              |                                                                                                                                                                                                                                       |      | B01AC06, N02BA01<br>B01AC04 B01AC22<br>B01AC24 B01AC07,<br>B01AC30 |
| Thyrotoxicosis                                  | E05                                                                                                                                                                                                                                   | H03B |                                                                    |
| Coronary artery disease                         | I20-25                                                                                                                                                                                                                                |      |                                                                    |
| Major bleeding                                  | I60-62<br>D500; D62<br><br>I850; I864A<br><br>K250; K252; K254;<br>K256; K260; K262;<br>K264; K266; K270;<br>K272; K274; K276;<br>K280; K282; K284;<br>K286<br>K290; K298A; K625;<br>K920; K921; K922<br>J942; R04<br>N02; R31<br>R58 |      |                                                                    |
| NSAID                                           |                                                                                                                                                                                                                                       | M01A |                                                                    |
| Peripheral artery diseases<br>and aortic plaque | I700; I702; I739                                                                                                                                                                                                                      |      |                                                                    |
| Renal disease                                   | N00-N05; N07; N11; N14;<br>N17; N18; N19; Q61, I12;<br>I13                                                                                                                                                                            |      |                                                                    |
| Liver disease                                   | B15.0; B16.0; B16.2;<br>B19.0; I85; K70.4; K72;<br>K76.6                                                                                                                                                                              |      |                                                                    |
